# Supplementary material
Source: Royal Society of Chemistry journal article supplement (doi:10.1039/d6cp00815a)
Supplement: d6cp00815a1.pdf [file d6cp00815a1.pdf]

# **Supporting Information for Accurate Adsorption Energies of Carbon-species on Copper Catalysts**

Yuhui Bai,<sup>1</sup> and Zhenbin Wang<sup>1,2\*</sup>

<sup>1</sup>School of Energy and Environment, City University of Hong Kong, Hong Kong SAR, 999077, China

<sup>2</sup>Department of Materials Science and Engineering, City University of Hong Kong, Hong Kong SAR, 999077, China

E-mail: [zwan22@cityu.edu.hk](mailto:zwan22@cityu.edu.hk)

**Table S1.** Comparison of adsorption energies calculated using PBE-D3/M06 with the force convergence criteria of 0.02 eV/Å and 0.05 eV/Å, respectively.

| Adsorbate          | Surface | Site         | Adsorption energies (eV) |           |
|--------------------|---------|--------------|--------------------------|-----------|
|                    |         |              | 0.05 eV/Å                | 0.02 eV/Å |
| *CO                | Cu(100) | top          | -0.59                    | -0.59     |
|                    |         | bridge       | -0.58                    | -0.58     |
|                    |         | hollow       | -0.20                    | -0.20     |
| *CO                | Cu(110) | top          | -0.49                    | -0.48     |
|                    |         | long bridge  | 0.43                     | 0.40      |
|                    |         | short bridge | -0.36                    | -0.36     |
|                    |         | hollow       | 0.41                     | 0.41      |
| *CO                | Cu(111) | top          | -0.54                    | -0.54     |
|                    |         | bridge       | -0.31                    | -0.31     |
|                    |         | hcp hollow   | -0.49                    | -0.49     |
|                    |         | fcc hollow   | -0.46                    | -0.45     |
| H <sub>2</sub> O   |         |              | -0.37                    | -0.37     |
| H <sub>2</sub>     |         |              | 0.02                     | 0.01      |
| CO <sub>2</sub>    | Cu(111) | phy          | -0.16                    | -0.16     |
| CH <sub>3</sub> OH |         |              | -0.44                    | -0.44     |
| HCOOH              |         |              | -0.48                    | -0.48     |

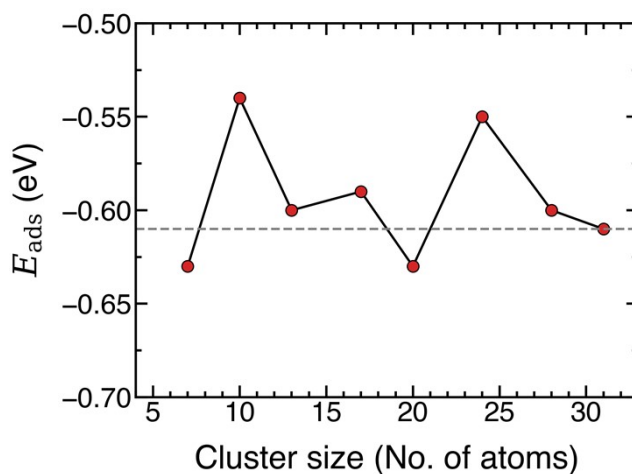

**Figure S1.** Calculated adsorption energies of CO on Cu clusters of different sizes. The clusters were created based on the Cu(111) surface.

**Table S2.** Adsorption energies (eV) of 18 additional C-species on copper surfaces, calculated using PBE and PBE-D3/M06, for machine learning model training and testing.

| Species                                    | PBE   | Molecular mass | PBE-D3/M06 |
|--------------------------------------------|-------|----------------|------------|
| *C <sub>2</sub> H <sub>2</sub> /Cu(111)    | -0.11 | 26             | -0.20      |
| CH <sub>4</sub> /Cu(111)                   | -0.07 | 16             | -0.14      |
| C <sub>3</sub> H <sub>8</sub> /(Cu100)     | -0.04 | 44             | -0.41      |
| *CHCOH/Cu(100)                             | 0.64  | 42             | 0.92       |
| *CHOH/Cu(100)                              | 1.13  | 30             | 1.60       |
| *CH <sub>3</sub> O/Cu(100)                 | -1.25 | 31             | -1.08      |
| *CCO/Cu(100)                               | 0.67  | 40             | 1.00       |
| *H <sub>2</sub> COO/Cu(100)                | 0.38  | 46             | 0.70       |
| C <sub>2</sub> H <sub>6</sub> /(Cu100)     | -0.10 | 30             | -0.33      |
| CH <sub>4</sub> /(Cu100)                   | -0.07 | 16             | -0.21      |
| C <sub>2</sub> H <sub>6</sub> /Cu(111)     | -0.10 | 30             | -0.32      |
| *CHCHO/Cu(100)                             | -0.28 | 42             | 0.13       |
| *CHCO/Cu(100)                              | -0.44 | 41             | -0.29      |
| C <sub>6</sub> H <sub>6</sub> /(Cu100)     | -0.09 | 78             | -0.77      |
| CH <sub>2</sub> O/Cu(111)                  | -0.04 | 30             | -0.17      |
| CH <sub>3</sub> COCH <sub>3</sub> /Cu(111) | 0.01  | 58             | -0.44      |
| CH <sub>3</sub> OCH <sub>3</sub> /Cu(111)  | -0.02 | 46             | -0.38      |
| *H <sub>2</sub> COOH                       | -0.11 | 47             | -0.38      |

**Table S3.** Free-energy corrections ( $G_{corr}$ , including zero-point energy and entropy) and solvation corrections ( $E_{sol}$ ).  $G_{corr}$  is computed relative to  $\text{CO}_2$ ,  $\text{H}_2$ , and  $\text{H}_2\text{O}$ . All values are reported in eV. Data were taken from Refs 1 and 2.

| System                   | $G_{corr}$ | $E_{sol}$ |
|--------------------------|------------|-----------|
| *COOH/Cu(100)            | 0.542      | -0.47     |
| *CO/Cu(100)              | 0.115      | -0.02     |
| *COOH/Cu(110)            | 0.542      | -0.43*    |
| *CO/Cu(110)              | 0.115      | -0.02     |
| *COOH/Cu(111)            | 0.542      | -0.38     |
| *CO/Cu(111)              | 0.115      | -0.02     |
| Gas Phase                |            |           |
| $\text{H}_2(\text{ref})$ | -0.03      | -         |
| $\text{CO}_2$            | -0.24      | -         |
| $\text{CO}$              | -0.44      | -         |
| $\text{H}_2\text{O}$     | 0.02       | -         |

The solvation correction for \*COOH on the Cu(110) surface was estimated by averaging the values for the Cu(100) and Cu(111) surfaces<sup>2</sup>, as no experimental or computational data are available in the literature.

**Table S4.** Calculated and experimental adsorption energies (eV) of CO on Cu(111). Values in parentheses indicate coverage in monolayers (ML). Experimental data were taken from Ref. 3.

| Source    | FHI-aims<br>(slab+cluster) | VASP (slab)+ORCA <sup>[a]</sup><br>(cluster) | Expt.       |
|-----------|----------------------------|----------------------------------------------|-------------|
| This work | -0.54                      | -0.49                                        | -0.57 (1/6) |
| Ref. 4    | -                          | -0.47                                        | -0.59 (1/4) |

<sup>[a]</sup> The computational setup from Ref. 4 was used here to validate the difference in adsorption energies arising from the methodology.

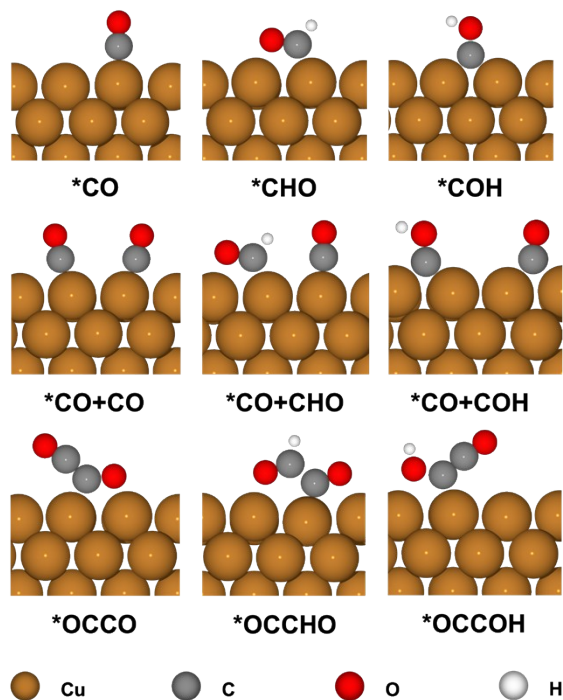

**Figure S2.** Side views of C-species adsorbed on Cu(100) surfaces. All illustrations are based on structures optimized using PBE-D3.

**Table S5.** Calculated adsorption free energies (eV) of various C-species (i.e., \*CO, \*CHO, \*COH, \*CO+\*CO, \*CO+\*CHO, \*CO+\*COH, \*OCCO, \*OCCHO, and \*OCCOH) on Cu(100) surfaces using PBE, PBE-D3 and PBE-D3/M06 methods. Deviations (eV) from reference RPA values are also included. The referenced PBE and RPA values were taken from Ref.5

| Species | PBE   | PBE[5, <sup>a</sup> ] | PBE-D3 | RPBE  | PBE-D3/M06 | RPA[5] |
|---------|-------|-----------------------|--------|-------|------------|--------|
| *CO     | -0.29 | -0.26                 | -0.50  | -0.04 | -0.02      | -0.002 |
| *CHO    | 0.51  | 0.50                  | 0.30   | 0.99  | 0.85       | 0.799  |
| *COH    | 0.66  | 0.65                  | 0.42   | 1.22  | 1.16       | 1.081  |
| *CO+CO  | -0.57 | -0.49                 | -0.98  | -0.01 | -0.11      | 0.021  |
| *CO+CHO | 0.22  | 0.26                  | -0.17  | 1.02  | 0.76       | 0.824  |
| *CO+COH | 0.44  | 0.42                  | 0.27   | 1.40  | 1.38       | 1.348  |
| *OCCO   | 0.61  | 0.58                  | 0.88   | 1.48  | 1.51       | 1.399  |
| *OCCHO  | 0.42  | 0.39                  | 0.31   | 1.36  | 1.03       | 1.094  |
| *OCCOH  | 0.58  | 0.54                  | 0.93   | 1.39  | 1.58       | 1.559  |
| MAE     | 0.62  | 0.61                  | 0.74   | 0.13  | 0.06       |        |
| RMSE    | 0.66  | 0.66                  | 0.77   | 0.17  | 0.07       |        |

[<sup>a</sup>] Values from Ref.5 were obtained with VASP and agree closely with our FHI-aims results.

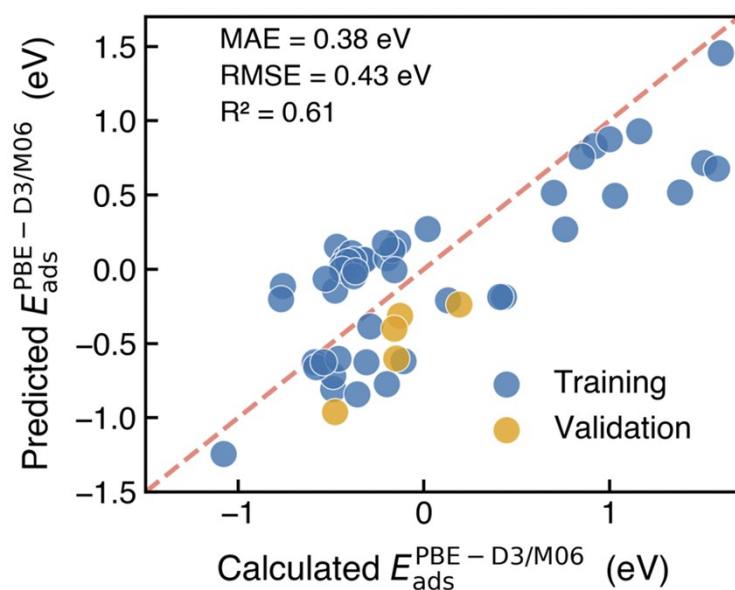

**Figure S3.** Performance of Linear Regression model in predicting PBE-D3/M06 adsorption energies. Blue and orange circles refer to training and validation data, respectively.

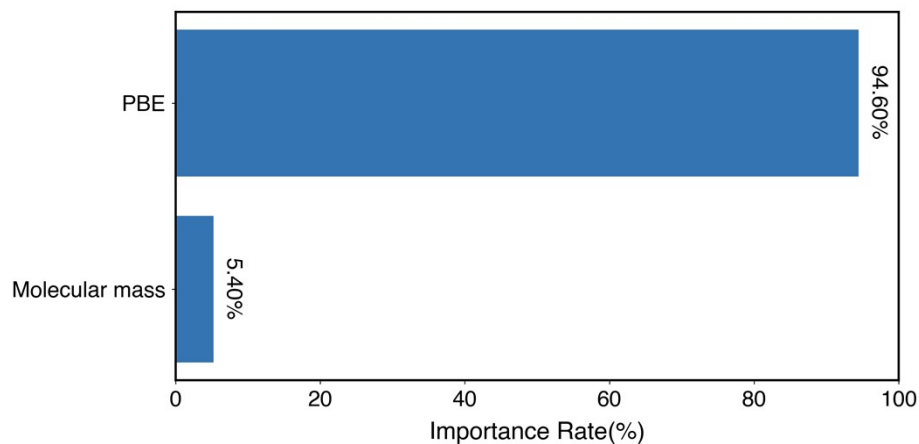

**Figure S4.** Feature importance ranking of the trained model for predicting PBE-D3/M06 adsorption energies, with PBE values identified as the most influential factor. This is consistent with the fact that the hybrid PBE-D3/M06 method is based on PBE calculations, supplemented with an empirical dispersion correction.

**Table S6.** Computation times (seconds) for M06 static calculations and PBE-D3 structure relaxations of representative surface adsorption systems, using an AMD 7763 CPU (128 cores).

| Systems                                | Time     |         |
|----------------------------------------|----------|---------|
|                                        | PBE-D3   | M06     |
| *CO/Cu(100)                            | 2939.64  | 194.73  |
| *CO+*CHO/Cu(100)                       | 12240.81 | 3305.19 |
| *OCCO/Cu(100)                          | 4568.42  | 1520.05 |
| *OCCOH/Cu(100)                         | 5591.97  | 2932.91 |
| C <sub>6</sub> H <sub>6</sub> /Cu(111) | 1376.84  | 594.03  |

## References

- 1 A. A. Peterson, F. Abild-Pedersen, F. Studt, J. Rossmeisl and J. K. Nørskov, How copper catalyzes the electroreduction of carbon dioxide into hydrocarbon fuels, *Energy Environ. Sci.*, 2010, **3**, 1311–1315.
- 2 Z. Chen, Z. Liu and X. Xu, Accurate descriptions of molecule-surface interactions in electrocatalytic CO<sub>2</sub> reduction on the copper surfaces, *Nat. Commun.*, 2023, **14**, 936.
- 3 P. Hollins and J. Pritchard, Interactions of CO molecules adsorbed on Cu(111), *Surf. Sci.*, 1979, **89**, 486–495.
- 4 R. B. Araujo, G. L. S. Rodrigues, E. C. Dos Santos and L. G. M. Pettersson, Adsorption energies on transition metal surfaces: towards an accurate and balanced description, *Nat. Commun.*, 2022, **13**, 6853.
- 5 Z. Wei and P. Sautet, Improving the Accuracy of Modelling CO<sub>2</sub> Electroreduction on Copper Using Many-Body Perturbation Theory, *Angew. Chem. Int. Ed.*, 2022, **61**, e202210060.
